# Supplementary material for: Fluorination on polyethylenimine allows efficient 2D and 3D cell culture gene delivery
Source: Royal Society of Chemistry journal article supplement (doi:10.1039/c4tb01447b), 2014-11-19
Supplement: c4tb01447b1.pdf [file c4tb01447b1.pdf]

## **Supporting information**

### **Fluorination on Polyethylenimine Allows Efficient 2D and 3D Cell Culture Gene Delivery**

Jia Lv<sup>1,a</sup>, Hong Chang<sup>1,a</sup>, Yu Wang<sup>2</sup>, Mingming Wang<sup>1</sup>, Jianru Xiao<sup>2</sup>, Qiang Zhang<sup>1</sup>, Yiyun Cheng<sup>1,\*</sup>

<sup>1</sup>Shanghai Key Laboratory of Regulatory Biology, School of Life Sciences, East China Normal University, Shanghai, 200241, P.R. China

<sup>2</sup>The Second Military Medical University, Changzheng Hospital, Department of Orthopedic Oncology, Shanghai PR China

<sup>a</sup> These authors contributed equally on this manuscript.

\*E-mail: [yycheng@mail.ustc.edu.cn](mailto:yycheng@mail.ustc.edu.cn)

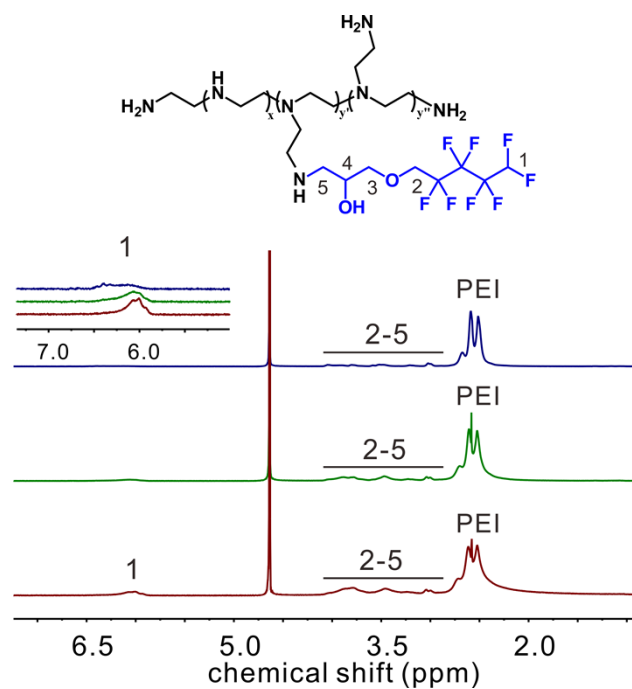

**Fig. S1.**  $^1\text{H}$  NMR spectra of the synthesized PEI-O-F $_{836}$ , PEI-O-F $_{878}$  and PEI-O-F $_{8133}$  in  $\text{D}_2\text{O}$ . The chemical structure of the synthesized materials with proton labeling is also shown in the figure. The number of fluoroalkyl chains conjugated to each PEI was calculated according to the peak integration ratio of proton 1 on the fluoroalkyl chain and protons on the PEI scaffold.

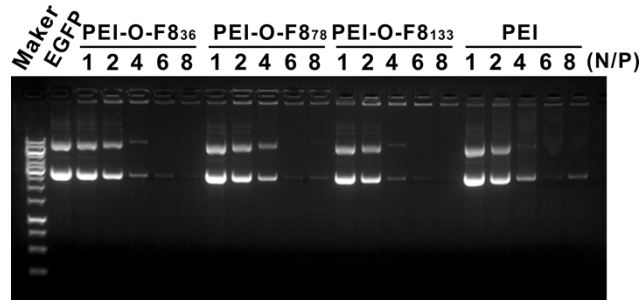

**Fig. S2.** Agarose gel electrophoresis analysis of PEI-O-F8<sub>36</sub>, PEI-O-F8<sub>78</sub>, PEI-O-F8<sub>133</sub> and PEI polyplexes with EGFP plasmids. The polyplexes were prepared at N/P ratios of 1:1, 2:1, 4:1, 6:1 and 8:1, respectively.

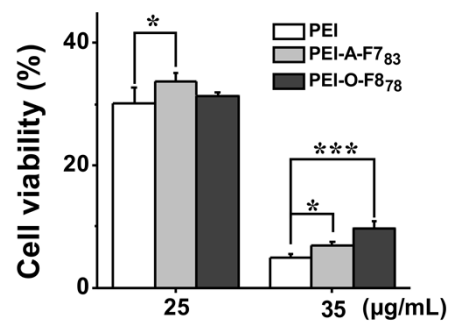

**Fig. S3.** Cytotoxicity of PEI, PEI-A-F<sub>783</sub> and PEI-O-F<sub>878</sub> on HeLa cells at 25 and 35 µg/mL, respectively. The data are analyzed by Student's t-test, \* p< 0.05, \*\*\*p <0.001.

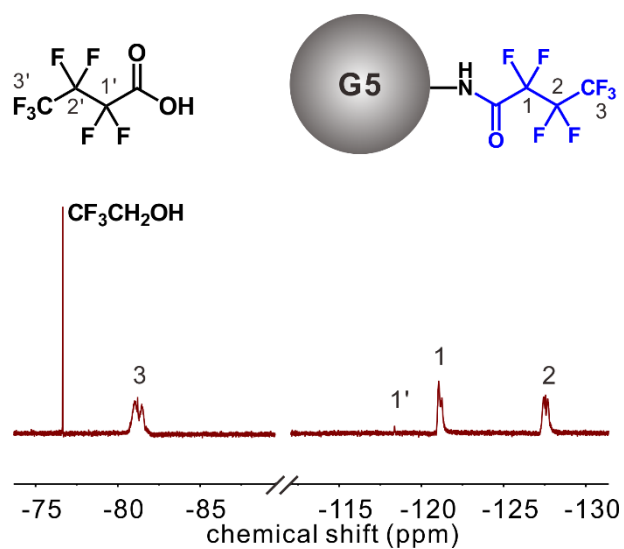

**Fig. S4.** <sup>19</sup>F NMR spectra of G5-F<sub>768</sub> after one year storage in water.

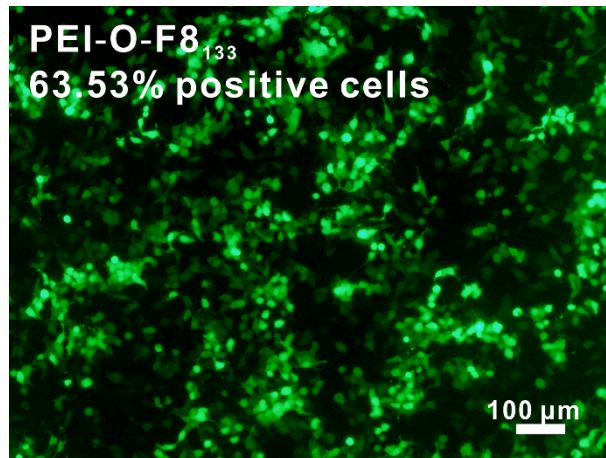

**Fig. S5.** Fluorescence microscopy image of HeLa cells transfected by PEI-O-F8<sub>133</sub> at an N/P ratio of 4:1. The samples were stored in water for 6 months before gene transfection experiments. EGFP transfection efficacy (%) of the material is given in the image.
